# Supplementary material for: Approximate models for the lattice thermal conductivity of alloy thermoelectrics
Source: Royal Society of Chemistry journal article supplement (doi:10.1039/d1tc02026a), 2021-01-01
Supplement: d1tc02026a1.pdf [file d1tc02026a1.pdf]

## Approximate models for the lattice thermal conductivity of alloy thermoelectrics: Supporting information

Jonathan M. Skelton<sup>1\*</sup>

<sup>1</sup> Department of Chemistry, University of Manchester, Oxford Road, Manchester M13 9PL, UK

\* Corresponding author. E-mail: [jonathan.skelton@manchester.ac.uk](mailto:jonathan.skelton@manchester.ac.uk)

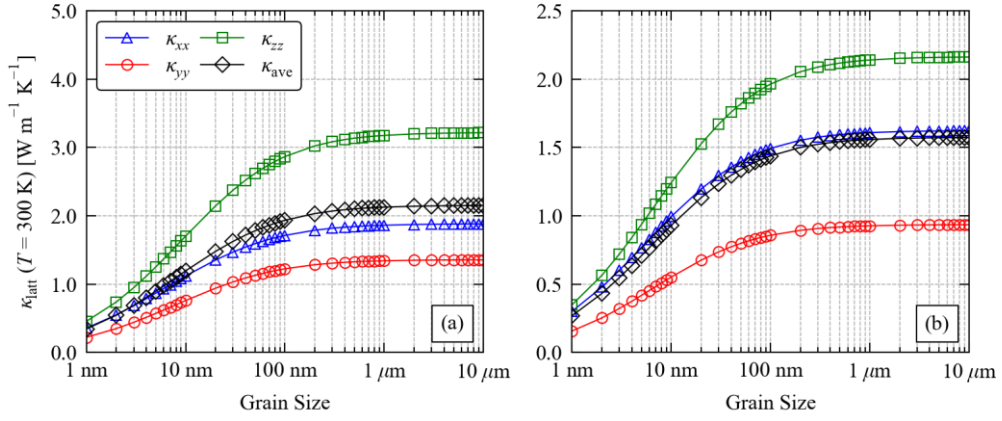

**Figure S1** Calculated thermal conductivity  $\kappa_{\text{latt}}$  of SnS (a) and SnSe (b) at  $T = 300$  K as a function of the crystal grain size, modelled using a boundary-scattering model to limit the phonon mean free paths. Each plot shows the principal  $\kappa_{xx}$ ,  $\kappa_{yy}$  and  $\kappa_{zz}$  components of the  $\kappa_{\text{latt}}$  tensor, corresponding to transport along the crystallographic  $a$ ,  $b$  and  $c$  axes, together with the diagonal average  $\kappa_{\text{ave}} = \frac{1}{3} \text{Tr}[\boldsymbol{\kappa}_{\text{latt}}] = \frac{1}{3} (\kappa_{xx} + \kappa_{yy} + \kappa_{zz})$ .

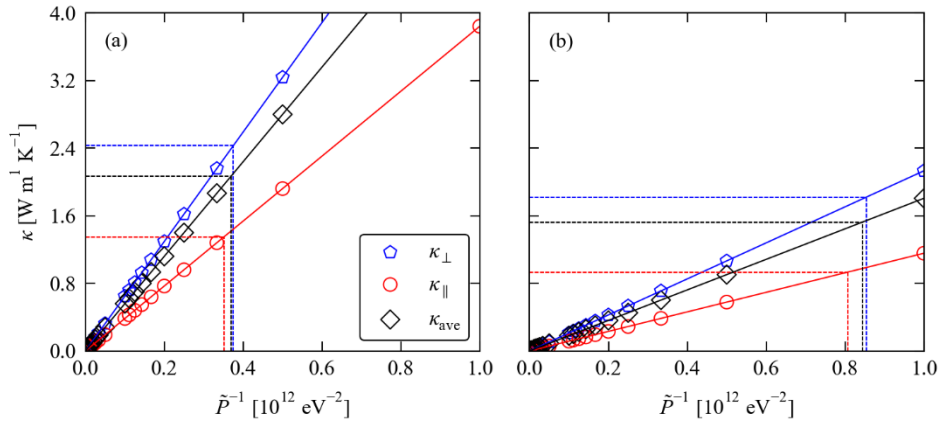

**Figure S2** Dependence of the in-plane ( $\kappa_{\perp}$ , blue), out-of-plane ( $\kappa_{\parallel}$ , red) and average thermal conductivity ( $\kappa_{\text{ave}} = \frac{1}{3} [2\kappa_{\perp} + \kappa_{\parallel}]$ , black) of SnS (a) and SnSe (b) at  $T = 300$  K, computed in 32-atom alloy supercells, on the averaged phonon-phonon interaction strength  $\tilde{P}$ . The values of  $\tilde{P}$  that reproduce the calculated  $\kappa_{\perp}$ ,  $\kappa_{\parallel}$  and  $\kappa_{\text{ave}}$  are indicated by dashed lines.

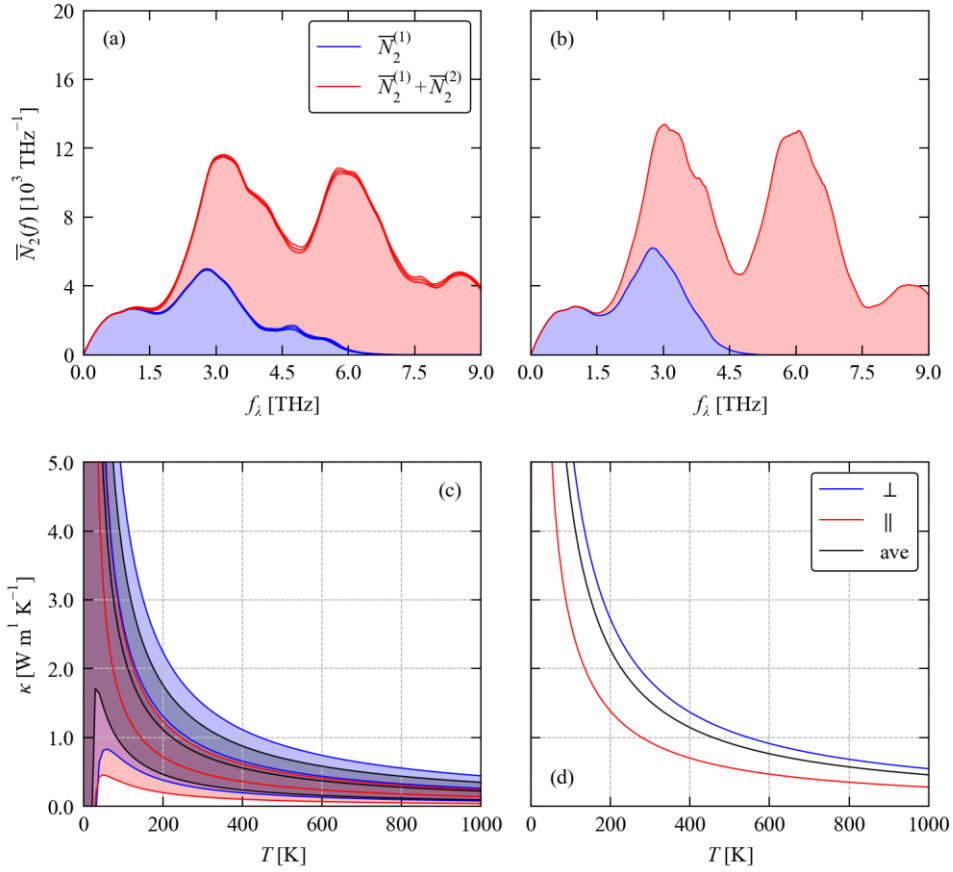

**Figure S3** Thermal conductivity of  $\text{Sn}(\text{S}_{0.1875}\text{Se}_{0.8125})$  predicted using the model defined in **Eq. 8** in the text with the phonon-phonon interaction strengths replaced by a constant value  $\tilde{P} = 1.469 \times 10^{-12} \text{ eV}^2$ . (a)/(b) Two-phonon weighted joint density-of-states functions  $\bar{N}_2(\omega)$  defined in **Eq. 13** in the text. (c)/(d) Predicted in-plane ( $\kappa_{\perp}$ , blue), out-of-plane ( $\kappa_{\parallel}$ , red) and average thermal conductivity ( $\kappa_{\text{ave}}$ , black). Plots (a) and (c) show calculations on the  $\text{Sn}(\text{S}_{0.1875}\text{Se}_{0.8125})$  alloy model, and the shaded areas indicate  $\pm$  one standard deviation. Plots (b) and (d) show calculations on  $\text{SnSe}$  for comparison. This plot is identical to **Fig. 9** in the text but includes the two alloy structures for which the  $\kappa_{\text{latt}}$  was deemed unphysically large.
